# Supplementary material
Source: PubMed Central journal article supplement (PMC4028130)
Supplement: NIHMS97387-supplement-Supp_Info.pdf [file NIHMS97387-supplement-Supp_Info.pdf]

**SUPP. TABLE S1.** Clinical features of subjects heterozygous for a germline *BRAF* gene mutation.

A: Angioma; AD: ascending aortic dilatation; AIS: aortic isthmus stenosis; AN: acanthosis nigricans; AP: advanced puberty; AS: asymmetric thelarche; B: brain atrophy; C: coloboma; CB: cortical blindness; CF: club feet; CFCS: cardiofaciocutaneous syndrome; CM1: Chiari malformation type 1; c.e.o. compatible with ethnic origin; DN: dystrophic nails; DP: delayed puberty; DS: dry skin ; EN: ependymal nodules; FD: fibrocystic dysplasia; FC: follicular ovarian cysts; FT: Fanconi tubulopathy; H: hernia; HCC: hypoplastic corpus callosum; IH: inguinal hernia; JC: large joint contractures; LP: lymphedema; LS: LEOPARD syndrome; M: macrostomia; MS: mitral stenosis; My: myopia; N: nystagmus; n.a. : data not available; n.app.: data not applicable; NS: Noonan syndrome; OFC: occipitofrontal circumference; PL: periventricular leukomalacia; PP: pes planus ; PUO: pyeloureteral obstruction ; S: strabismus; SS: soft skin; UT: undescended testis; VD: ventricular dilatation.

| <b>PATIENT CODE</b>       | <b>N01</b> | <b>N02</b> | <b>N03</b> | <b>N04</b> | <b>N05</b> | <b>N06</b> | <b>N07</b> | <b>N08</b> | <b>N09</b> | <b>N10</b> | <b>N11</b> | <b>N12</b> |
|---------------------------|------------|------------|------------|------------|------------|------------|------------|------------|------------|------------|------------|------------|
| <b>Clinical diagnosis</b> | LS         | NS         | NS         | NS         | NS         | NS         | CFCS       | CFCS       | CFCS       | CFCS       | CFCS       | CFCS       |
| <b>Amino acid change</b>  | T241P      | T241M      | W531C      | W531C      | L597V      | T241R      | E275K      | L245F      | A246P      | Q257R      | G469E      | L485F      |
| <b>Sex/age (yrs)</b>      | M/15.8     | F/15.5     | F/3.2      | F/15.2     | F/7.5      | F/1.2      | F/7.0      | M/0.3      | F/7        | F/1.8      | F/0.8      | F/7        |

|                                        |         |         |         |         |         |         |         |         |         |         |         |         |
|----------------------------------------|---------|---------|---------|---------|---------|---------|---------|---------|---------|---------|---------|---------|
| <b>Polyhydramnios</b>                  | no      | no      | no      | no      | no      | no      | yes     | no      | yes     | yes     | yes     | yes     |
| <b>Fetal macrosomia</b>                | no      | yes     | no      | no      | n.a.    | yes     | n.a.    | yes     | no      | yes     | yes     | yes     |
| <b>Birth weight (gr)/weeks</b>         | 3400/40 | 4350/39 | 2500/34 | 2630/37 | 3610/38 | 3950/37 | 3330/30 | 4050/40 | 2300/33 | 3250/39 | 4050/39 | 3630/38 |
| <b>OFC at birth (cm)</b>               | 35      | 35      | 32      | 34      | 36,2    | 35      | 34      | 35      | 33      | n.a.    | 37      | 36      |
| <b>Neonatal growth failure</b>         | no      | yes     |
| Poor sucking                           | no      | yes     | yes     | yes     | no      | yes     | yes     | yes     | yes     | yes     | yes     | no      |
| Poor swallowing                        | no      | yes     | yes     | yes     | no      | yes     | yes     | yes     | yes     | yes     | no      | yes     |
| Tube feeding                           | no      | yes     | no      | yes     | no      | no      | yes     | no      | yes     | yes     | no      | yes     |
| Esophageal anomalies                   | no      | no      | yes     | yes     | no      | no      | yes     | no      | no      | yes     | no      | yes     |
| <b>Short stature (&lt;3rd centile)</b> | yes     | yes     | Yes     | yes     | yes     | yes     | no      | no      | yes     | yes     | no      | yes     |
| <b>Craniofacial anomalies</b>          | yes     |
| Macrocephaly                           | yes     | no      | yes     | no      | yes     | yes     | yes     | no      | yes     | yes     | no      | no      |
| Dolicocephaly                          | yes     | yes     | yes     | yes     | no      | yes     | yes     | no      | no      | yes     | yes     | no      |
| Prominent forehead                     | yes     | yes     | no      | yes     | yes     | yes     | no      | no      | yes     | yes     | yes     | yes     |
| Bitemporal narrowing                   | yes     | yes     | no      | yes     | no      | yes     | yes     | yes     | no      | yes     | yes     | no      |
| Downslanting palpebral fissures        | yes     | yes     | no      | no      | yes     | yes     | no      | yes     | yes     | yes     | no      | no      |
| Hypertelorism                          | yes     | yes     | yes     | yes     | yes     | yes     | no      | yes     | no      | yes     | yes     | yes     |
| Thick palpebral lids                   | yes     | yes     | no      | no      | no      | yes     | no      | yes     | no      | yes     | yes     | no      |
| Epicanthal folds                       | no      | yes     | no      | yes     | no      | yes     |
| Palpebral ptosis                       | yes     | yes     | no      | no      | yes     |
| Flat nasal bridge                      | no      | no      | yes     | yes     | no      | yes     | no      | yes     | yes     | yes     | yes     | yes     |
| Thick lips                             | yes     | yes     | no      | no      | no      | yes     | no      | yes     | no      | yes     | yes     | no      |
| Low-set ears with thickened helix      | yes     | yes     | no      | yes     |
| Large thick ear lobe                   | no      | yes     | no      | no      | yes     | no      | no      | yes     | no      | yes     | no      | yes     |
| Prominent/pointed/receding chin        | yes     | yes     | no      | no      | yes     | no      | yes     | no      | yes     | yes     | no      | yes     |
| Low posterior hairline                 | yes     | yes     | no      | no      | yes     | no      | yes     | yes     | yes     | yes     | no      | no      |
| <b>Cardiac anomalies</b>               | yes     | no      | no      | no      | yes     |
| <b>Hypertrophic cardiomyopathy</b>     | no      | yes     | yes     | yes     | yes     | yes     |
| <b>Congenital heart defect</b>         | yes     | no      | no      | no      | yes     |
| Polyvalvular dysplasia                 | yes     | no      |
| Pulmonary valve stenosis               | no      | no      | no      | no      | no      | yes     | yes     | yes     | yes     | yes     | no      | no      |
| Pulmonary valve dysplasia              | no      | no      | no      | no      | no      | yes     | n.a.    | yes     | no      | no      | no      | no      |
| Mitral valve dysplasia                 | yes     | no      | yes     | no      |
| Supravalvular pulmonary stenosis       | no      | no      | no      | no      | no      | yes     | no      | yes     | no      | no      | no      | no      |
| Atrial septal defect                   | no      | no      | no      | no      | yes     | no      | no      | yes     | no      | no      | no      | no      |
| Other                                  | no      | MS, AIS | no      | no      |
| <b>ECG anomalies/arrhythmias</b>       | no      | yes     | no      | no      | no      | no      |
| <b>Ectodermal anomalies</b>            | yes     | yes     | yes     | yes     | no      | no      | yes     | yes     | yes     | yes     | yes     | yes     |
| Absent/hypoplastic eyebrows            | no      | no      | no      | no      | no      | no      | yes     | Yes     | yes     | yes     | yes     | yes     |
| Curly hairs                            | yes     | yes     | no      | no      | c.e.o.  | no      | yes     | no      | yes     | no      | no      | yes     |
| Sparse hair                            | no      | yes     | yes     | yes     | yes     | yes     |
| Hyperkeratosis                         | yes     | no      | no      | no      | no      | no      | yes     | no      | no      | yes     | yes     | no      |
| Keratosis pilaris                      | no      | no      | no      | no      | n.a.    | no      | n.a.    | no      | no      | yes     | yes     | yes     |
| Hyperhidrosis                          | n.a.    | n.a.    | yes     | no      | n.a.    | n.a.    | n.a.    | n.a.    | no      | yes     | yes     | yes     |
| Deep palmar/plantar creases            | no      | no      | yes     | no      | no      | no      | no      | no      | no      | yes     | no      | no      |
| Dark skin pigmentation                 | no      | yes     | no      | yes     | yes     |
| Naevi (number)                         | yes     | yes     | no      | yes     | no      |
| Cafè au lait spots                     | 2       | no      | 2       | no      |
| Lentigo (number)                       | >40     | >40     | 3       | >20     | no      | >30     |
| Lentigo colour and dimension           | dark    | dark    | black   | dark    | n.app.  | black   |
| <b>Skeletal anomalies</b>              | yes     |
| Short/webbed neck                      | yes     | yes     | no      | no      | yes     | no      | yes     | yes     | yes     | yes     | no      | no      |
| Cubitus valgus                         | no      | yes     | yes     | yes     | no      | no      | no      | no      | yes     | yes     | no      | no      |
| Broad chest/telethelia                 | yes     | yes     | no      | yes     | no      | yes     |



|                                |       |        |       |          |       |                       |       |        |              |                  |       |
|--------------------------------|-------|--------|-------|----------|-------|-----------------------|-------|--------|--------------|------------------|-------|
| Absent/hypoplastic eyebrows    | no    | yes    | yes   | yes      | no    | yes                   | no    | yes    | yes          | yes              | yes   |
| Curly hairs                    | yes   | no     | yes   | yes      | yes   | yes                   | yes   | no     | yes          | no               | yes   |
| Sparse hair                    | no    | no     | yes   | yes      | yes   | no                    | no    | yes    | no           | yes              | no    |
| Hyperkeratosis                 | no    | yes    | no    | yes      | no    | no                    | no    | yes    | yes          | no               | no    |
| Keratosis pilaris              | yes   | yes    | no    | n.a.     | no    | n.a.                  | no    | no     | n.a.         | yes              | yes   |
| Hyperhidrosis                  | yes   | yes    | yes   | n.a.     | yes   | n.a.                  | yes   | no     | n.a.         | yes              | n.a.  |
| Deep palmar/plantar creases    | no    | no     | no    | n.a.     | yes   | yes                   | yes   | no     | yes          | yes              | no    |
| Dark skin pigmentation         | no    | yes    | no    | no       | no    | no                    | yes   | no     | no           | yes              | no    |
| Naevi (number)                 | yes   | yes    | no    | no       | no    | yes                   | yes   | no     | no           | no               | no    |
| Café au lait spots             | yes   | yes    | no    | no       | no    | 1                     | no    | no     | no           | no               | no    |
| Lentigo (number)               | >100  | no     | 6     | no       | >10   | no                    | 20    | no     | no           | no               | >100  |
| Lentigo colour and dimension   | brown | n.app. | black | n.app.   | black | n.app.                | brown | n.app. | n.app.       | n.app.           | dark  |
| <b>Skeletal anomalies</b>      | yes   | yes    | yes   | yes      | yes   | yes                   | yes   | yes    | yes          | yes              | yes   |
| Short/webbed neck              | yes   | yes    | no    | yes      | yes   | yes                   | no    | yes    | no           | yes              | no    |
| Cubitus valgus                 | yes   | no     | no    | no       | yes   | no                    | yes   | yes    | no           | yes              | yes   |
| Broad chest/telethelia         | yes   | yes    | yes   | yes      | yes   | no                    | yes   | yes    | no           | yes              | no    |
| Pectus excavatum/carinatum     | yes   | yes    | yes   | no       | no    | yes                   | yes   | no     | yes          | yes              | yes   |
| Small joint hyperextensibility | No    | yes    | no    | n.a.     | no    | yes                   | yes   | yes    | n.a.         | no               | no    |
| Scoliosis                      | No    | no     | no    | no       | yes   | no                    | yes   | no     | yes          | yes              | no    |
| <b>Neurologic</b>              | yes   | yes    | yes   | yes      | yes   | yes                   | yes   | yes    | yes          | yes              | yes   |
| Mental retardation             | yes   | yes    | yes   | yes      | yes   | yes                   | yes   | yes    | yes          | yes              | no    |
| Seizures                       | yes   | no     | no    | yes      | yes   | yes                   | yes   | yes    | yes          | yes              | no    |
| Hypotonia                      | yes   | yes    | no    | yes      | yes   | yes                   | yes   | yes    | yes          | yes              | no    |
| Hearing loss                   | No    | no     | no    | yes      | yes   | no                    | no    | n.a.   | no           | no               | yes   |
| <b>Coagulation disorders</b>   | No    | no     | no    | no       | no    | no                    | no    | no     | no           | no               | no    |
| <b>Ocular anomalies</b>        | S, N  | no     | yes   | CB       | CB, N | N                     | N     | N      | S            | S                | S, My |
| <b>Other features</b>          | AP    | UT, AN |       | M, B, SS |       | AP, AS,<br>FC, SS, DN | UT, H |        | B, IH,<br>JC | M, DP,<br>VD, CF | M     |
